# Supplementary material for: Deficiency of muscular dystrophy–related gene JAG2 causes NOTCH signaling dysfunction in muscle stem cells
Source: JCI journal article supplement (doi:10.1172/jci198639), 2026-05-19

# Unedited blotting Images for Figure 6I and 6J

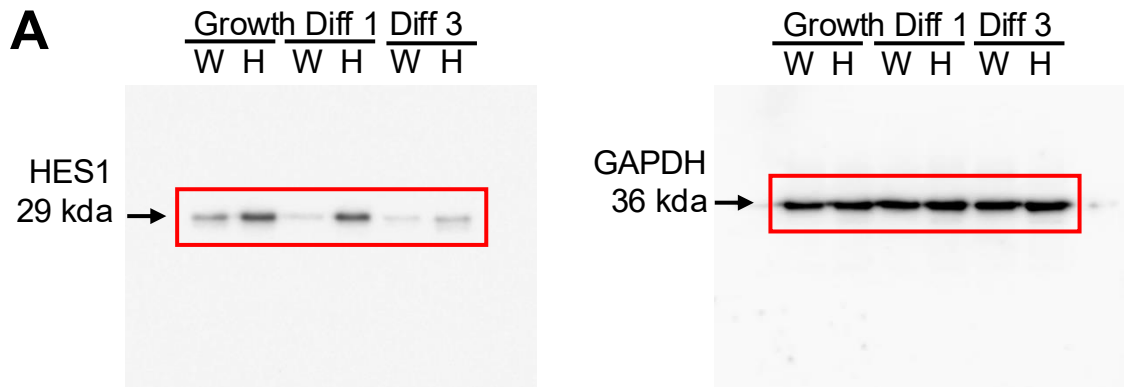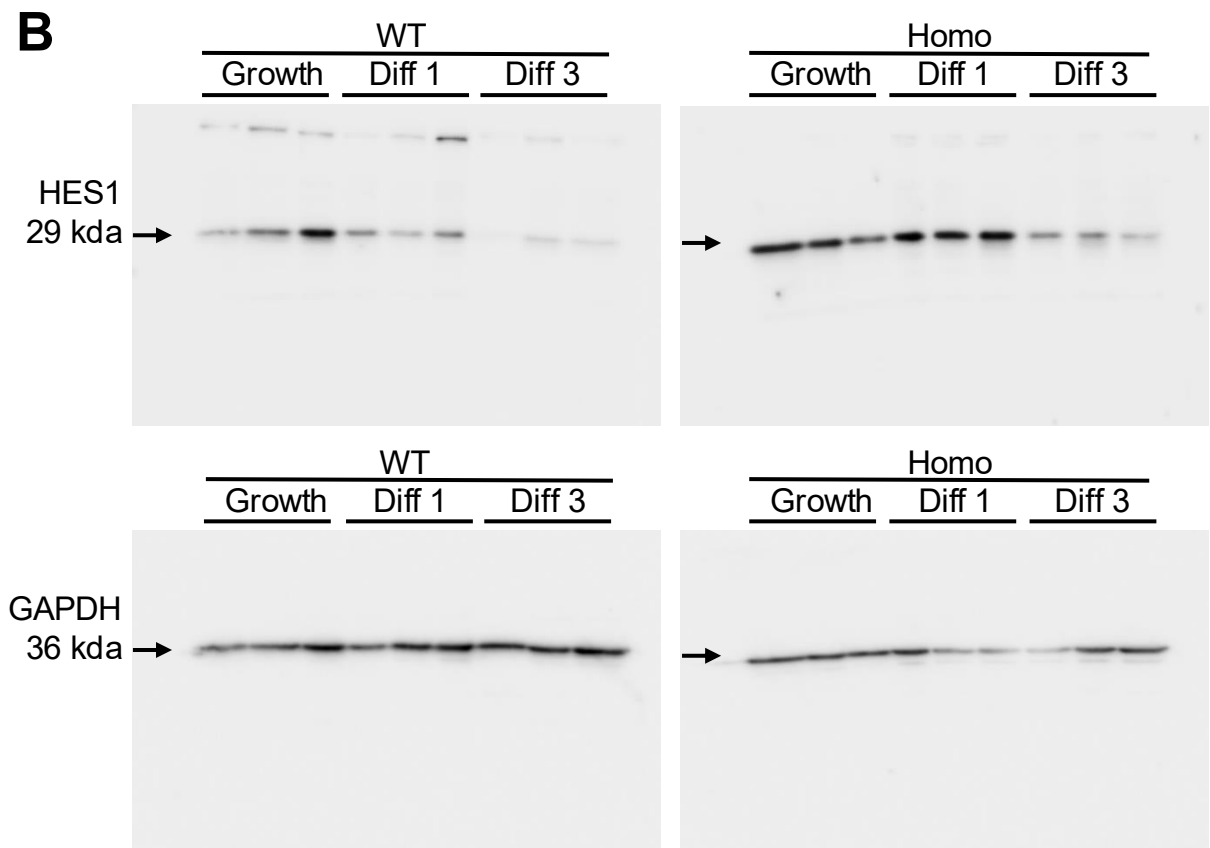

# Unedited Gel Images for Supplemental Figure 7B

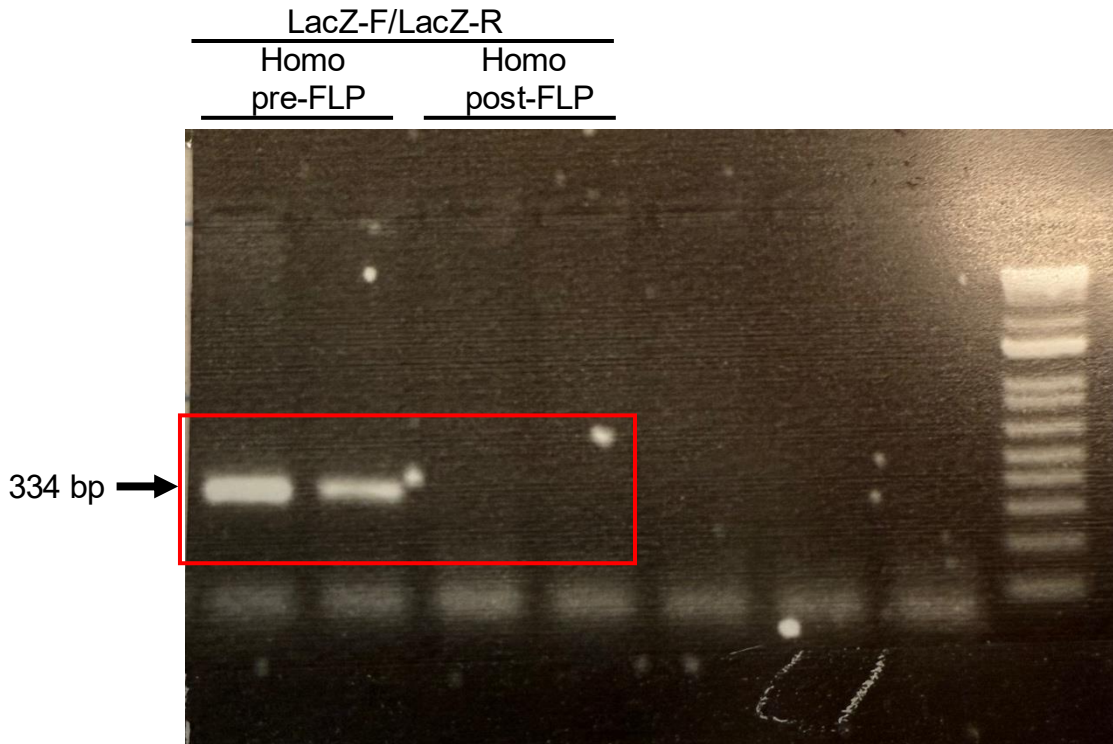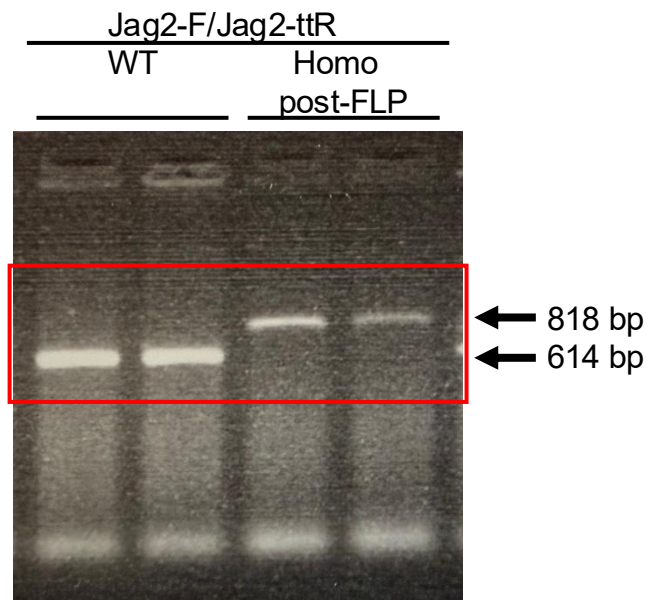

Supplement: sd1 [file 1]
